# Supplementary material for: Endoplasmic reticulum stress is involved in spiral ganglion neuron apoptosis following chronic kanamycin-induced deafness
Source: PubMed Central journal article supplement (PMC6592474; doi:10.1042/bsr20181749), 2019-02-08

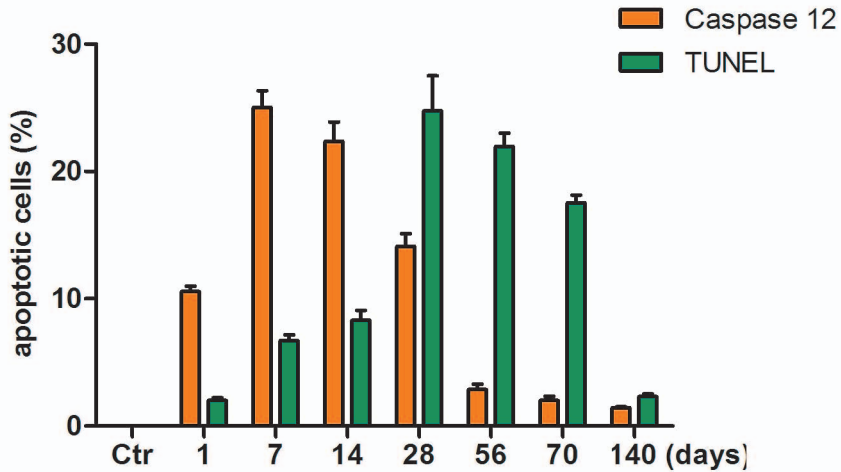

Supplement: bsr-39-bsr20181749_Supp1.pdf [file bsr-39-bsr20181749_Supp1.pdf]
